# Supplementary material for: Global temporal patterns of pancreatic cancer and association with socioeconomic development
Source: PubMed Central journal article supplement (PMC5466634; doi:10.1038/s41598-017-02997-2), 2017-06-09

# **Global patterns and temporal trend of pancreatic cancer: a joinpoint regression analysis**

Martin CS Wong MD, MPH<sup>1,2</sup>, \*, Johnny JY Jiang MD, PhD<sup>3</sup>, Miaoyin Liang MPH<sup>1</sup>, Yuan Fang PhD<sup>1</sup>, Ming Sze Yeung BSc (Hons)<sup>1</sup>, Joseph JY Sung MD, PhD<sup>2,4,5</sup>

1. School of Public Health and Primary Care, Faculty of Medicine, Chinese University of Hong Kong. Prince of Wales Hospital, Shatin, New Territories, Hong Kong

2. Institute of Digestive Disease, Faculty of Medicine, Chinese University of Hong Kong

3. Chinese Academy of Medical Sciences and Peking Union Medical College, China

4. Department of Medicine and Therapeutics, Faculty of Medicine, Chinese University of Hong Kong

5. State Key Laboratory of Digestive Disease, Faculty of Medicine, Chinese University of Hong Kong

**Keywords:** pancreatic cancer; global trend; incidence; mortality; socioeconomic development

## **Correspondence:**

Martin C.S. Wong BMedSc (Hons), MSc (Hons), MBChB, MD, MPH, MBA, FRSPH, FRSP,

FRIPH, FRACGP, FHKCFP, DCH, FHKAM, FHKAN

Professor of Family Medicine and Primary Healthcare, JC School of Public Health and Primary Care, Faculty of Medicine, The Chinese University of Hong Kong

Consultant (Honorary), Department of Family Medicine, Hospital Authority

**Tel:** (852) 2252 8782 **Fax:** (852) 2606 3500; **Email:** wong\_martin@cuhk.edu.hk

**Address:** 4/F, School of Public Health, Prince of Wales Hospital, Shatin, N.T., Hong Kong

# Supplementary Figure 1a Findings from the joinpoint regression analysis of the global incidence rates of pancreatic cancer (Left: Male, Right: Female)

## 1) Latin America and the Caribbean

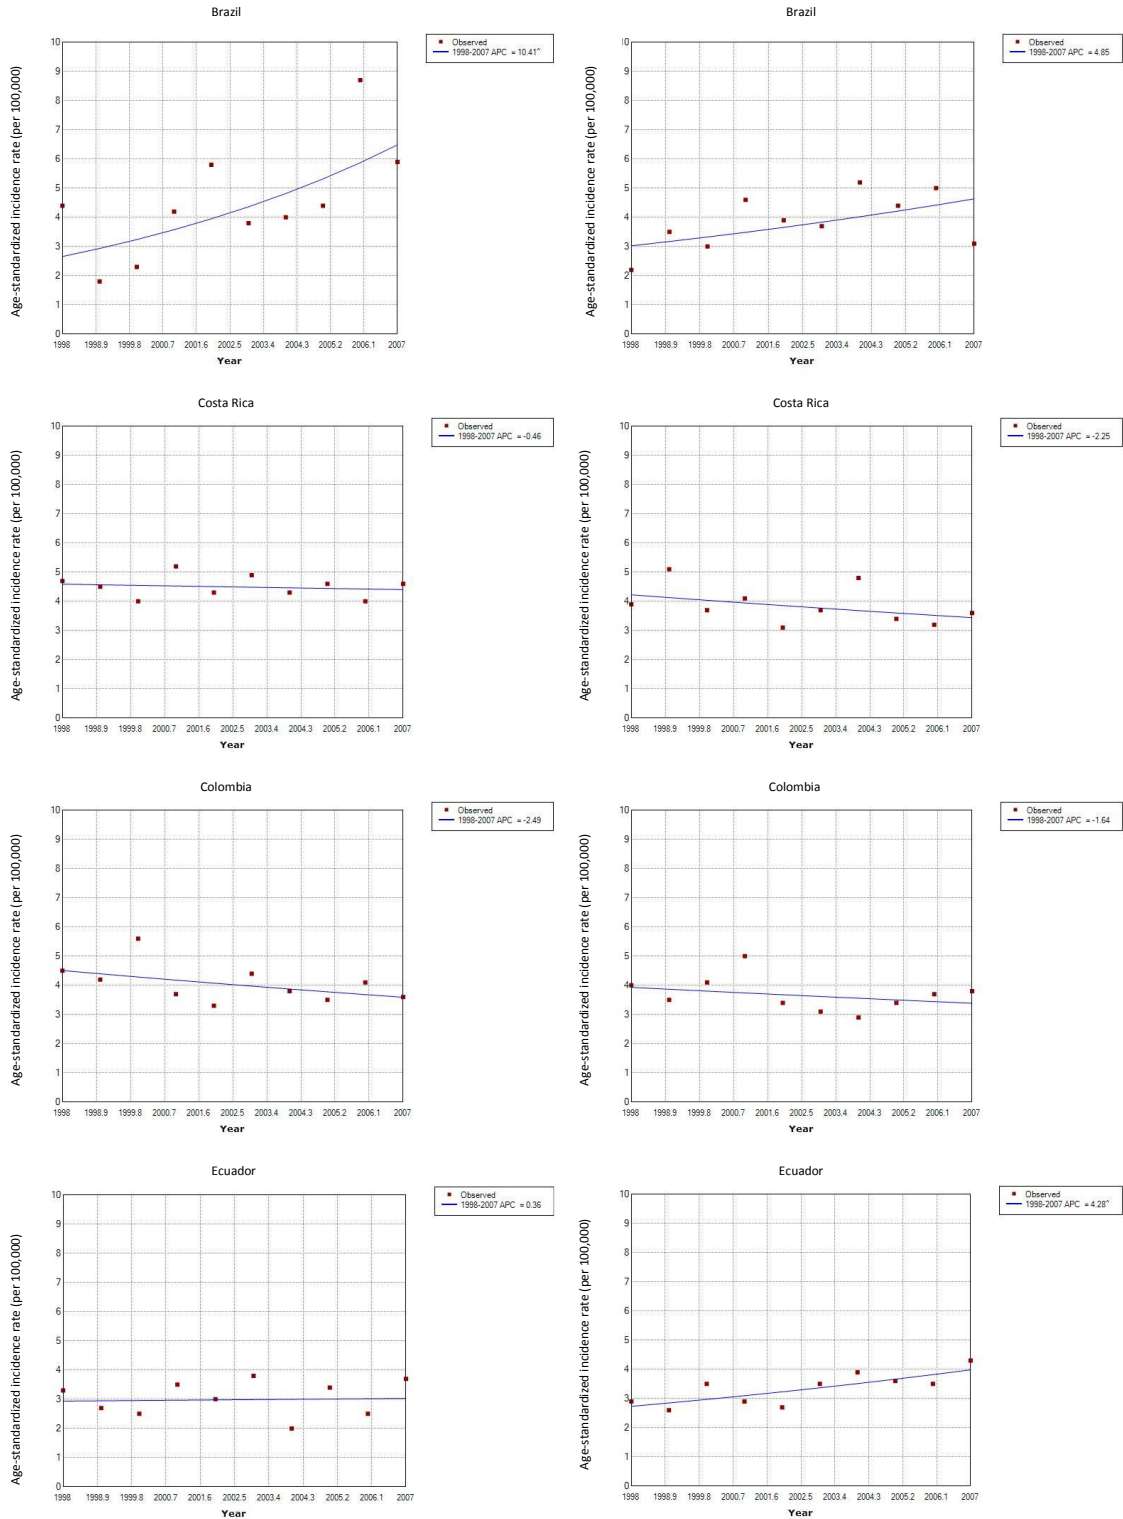

## 2) Northern America

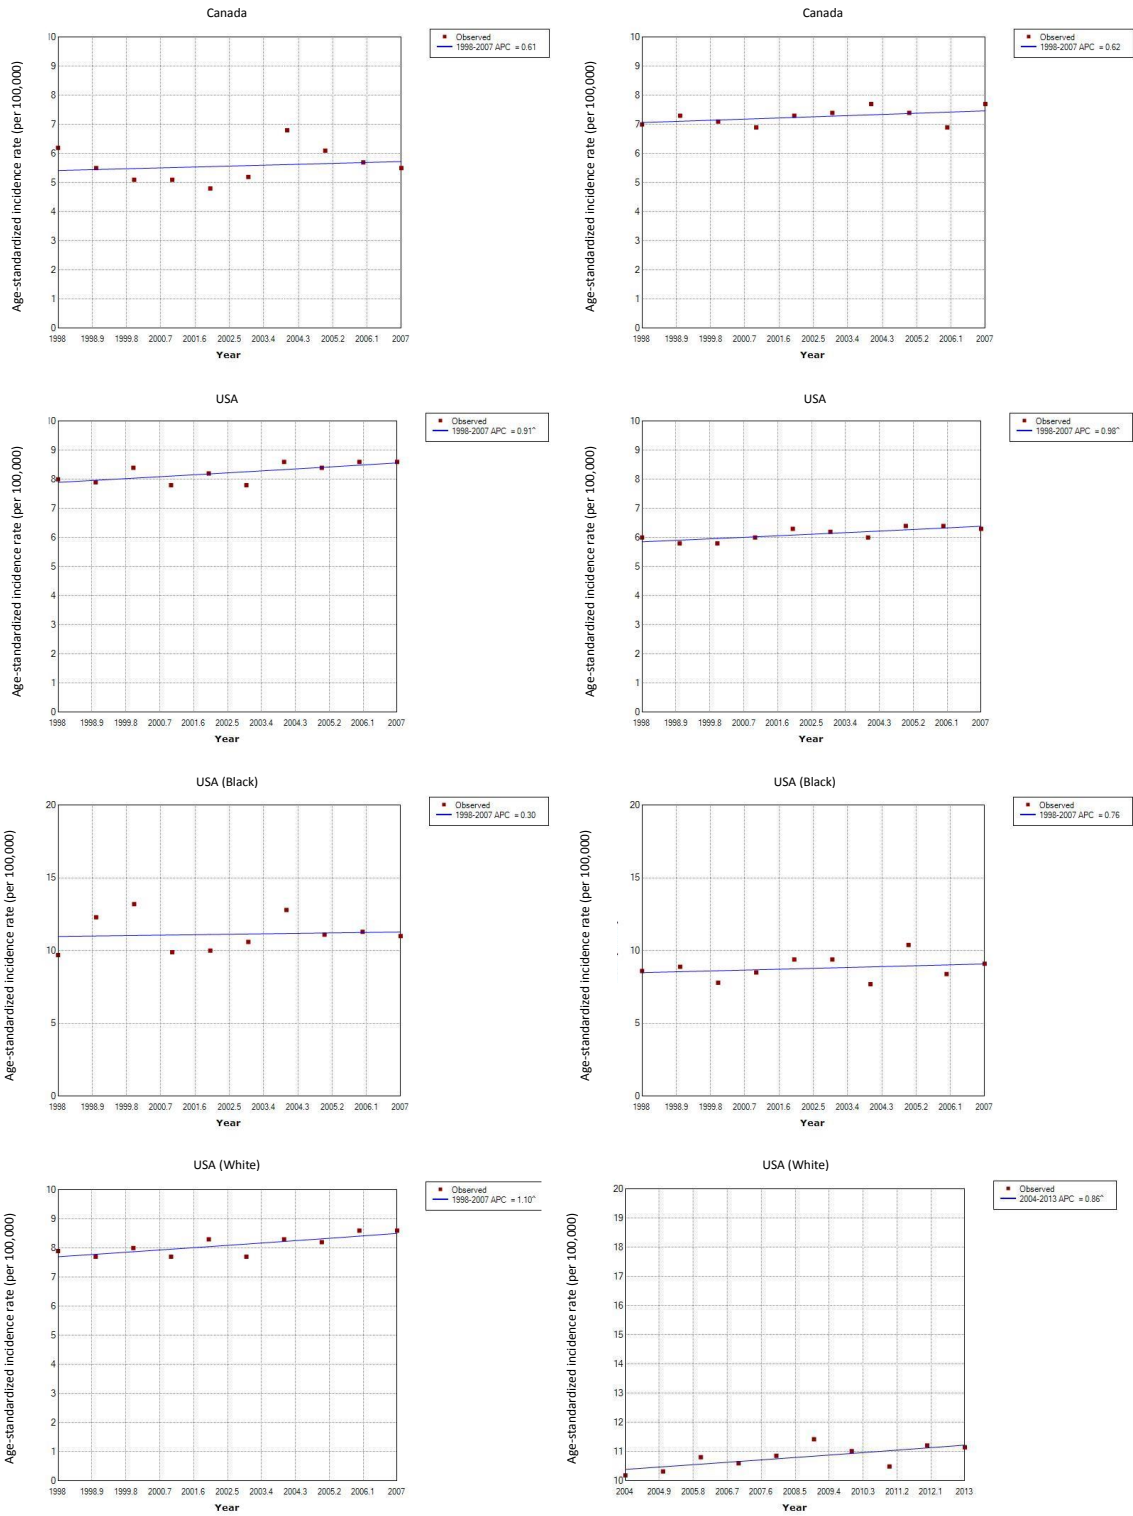

## 3) Asia

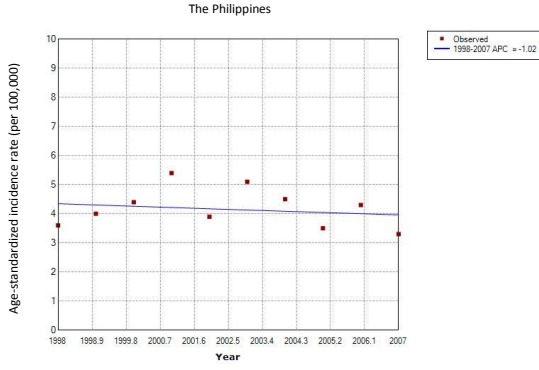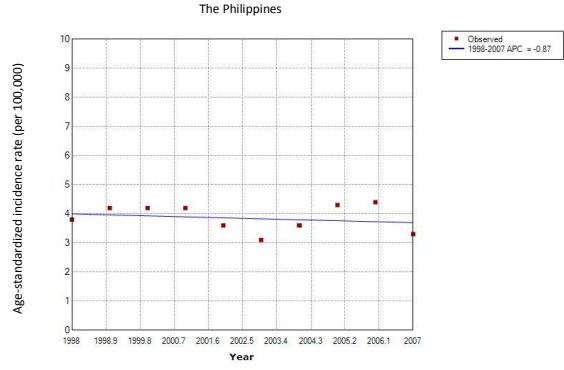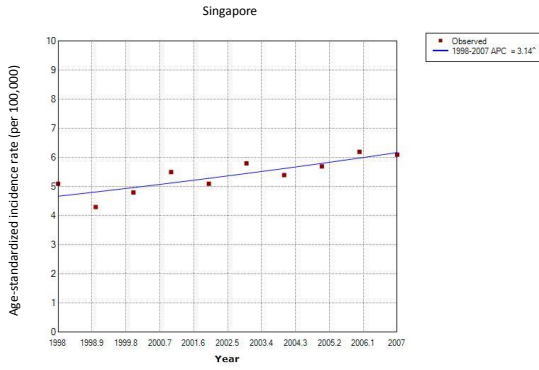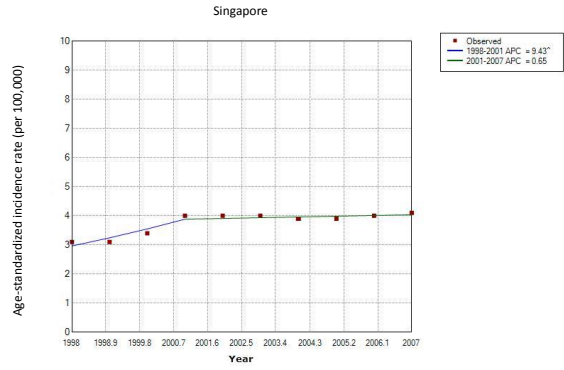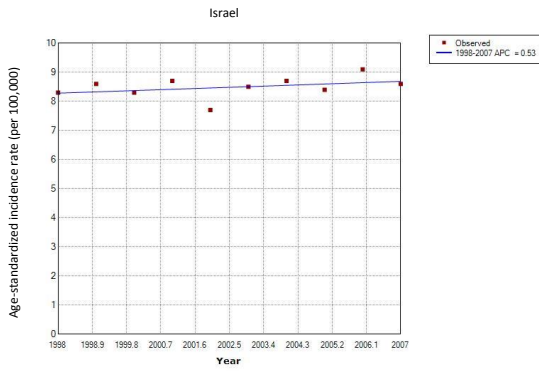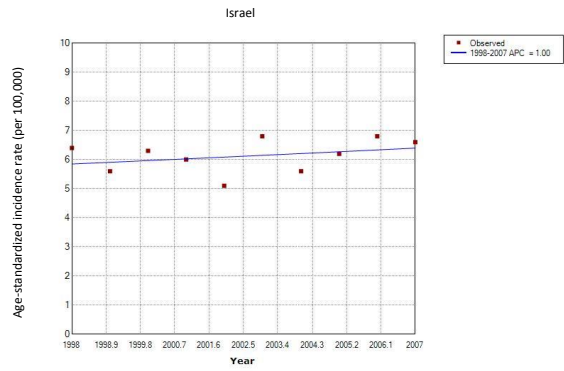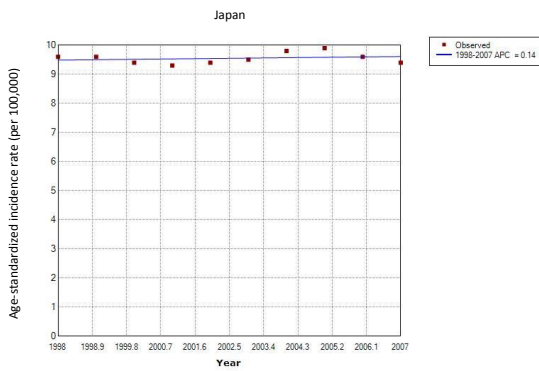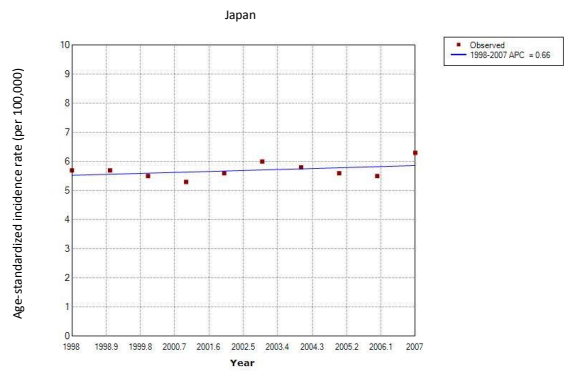

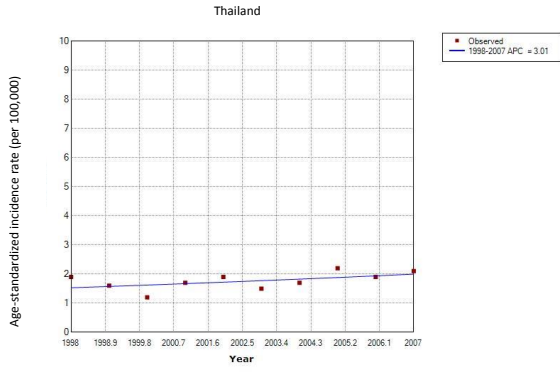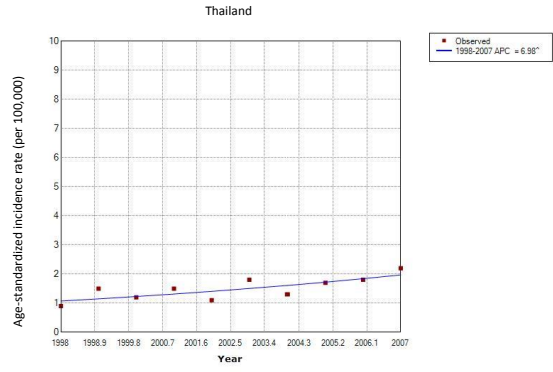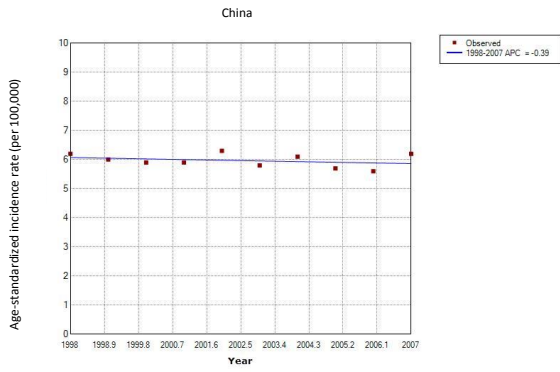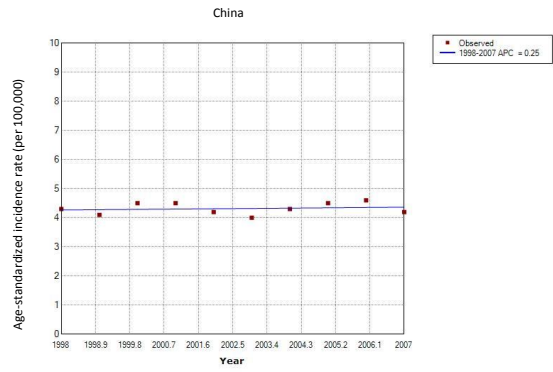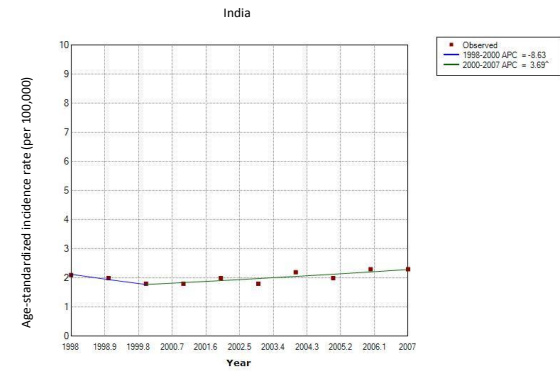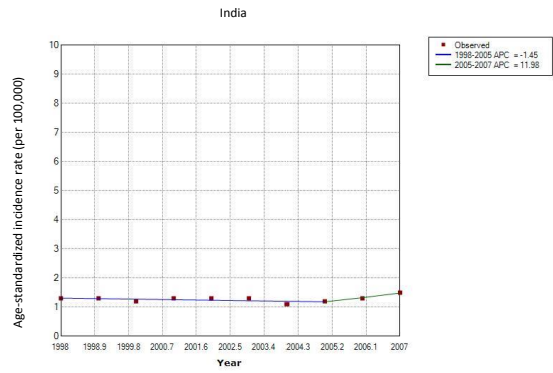

#### 4) Oceania

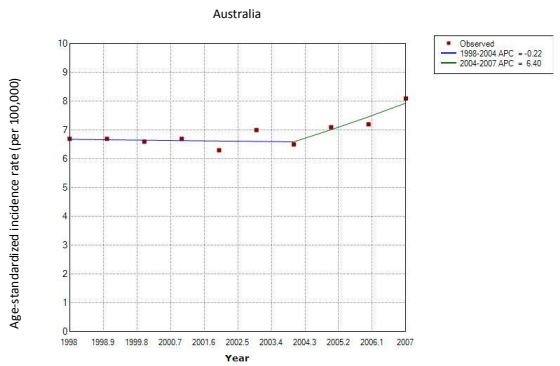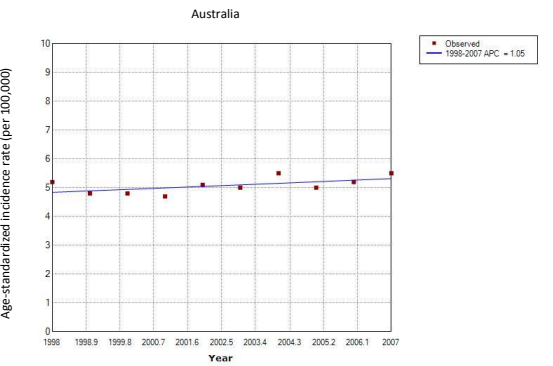

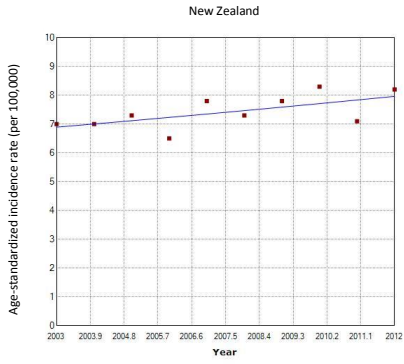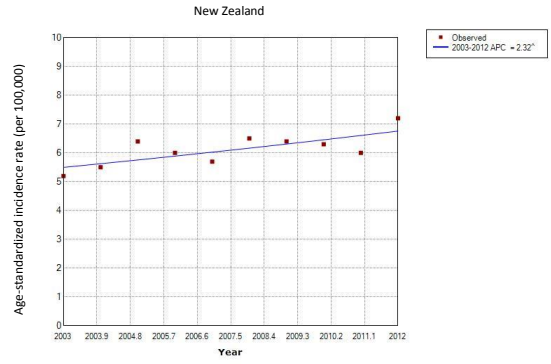

## 5) Northern Europe

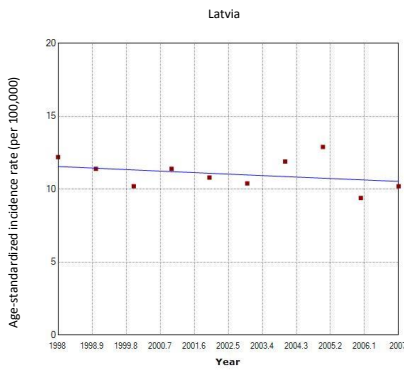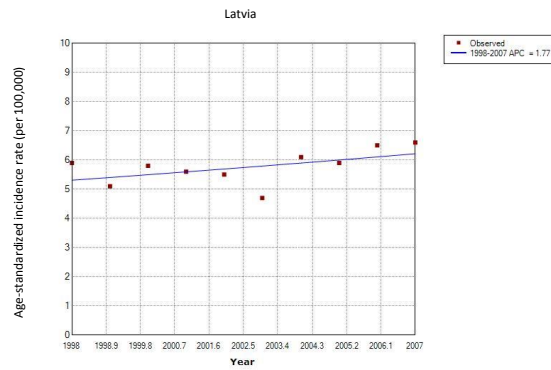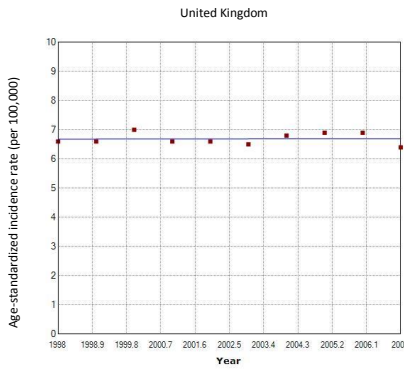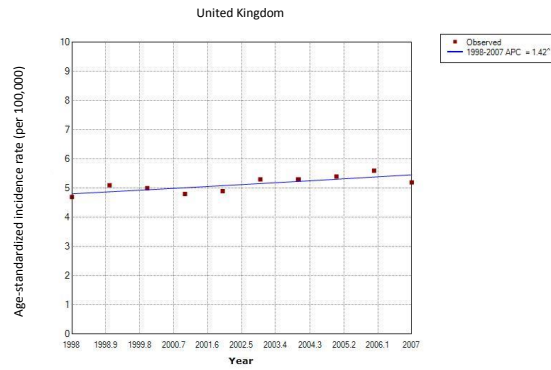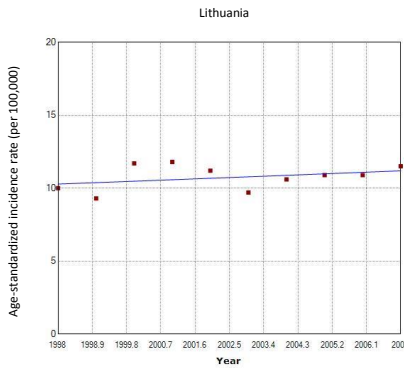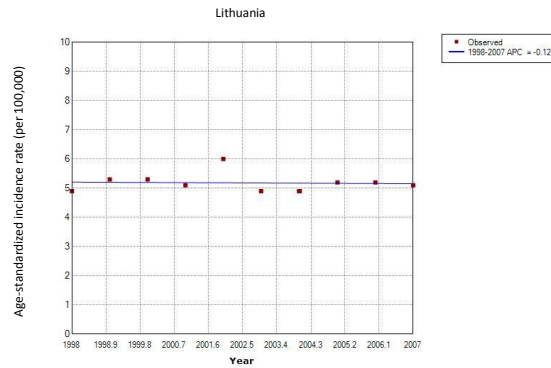

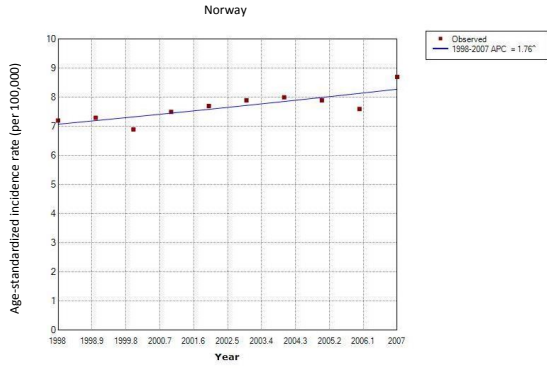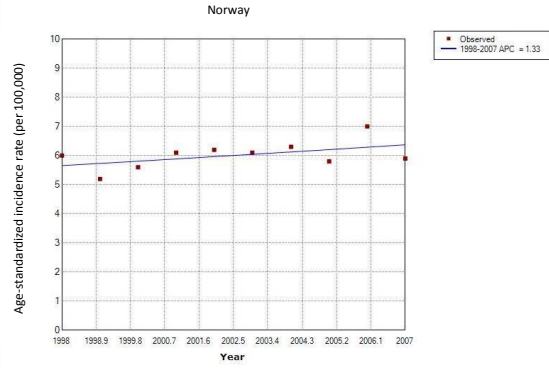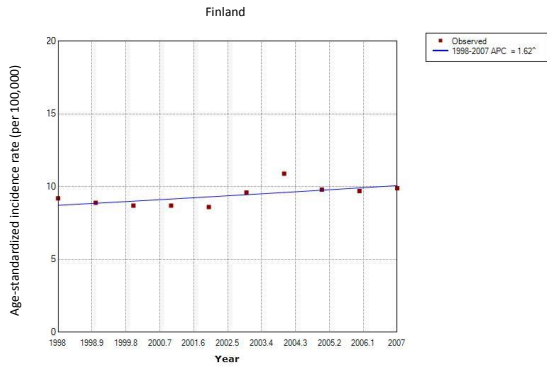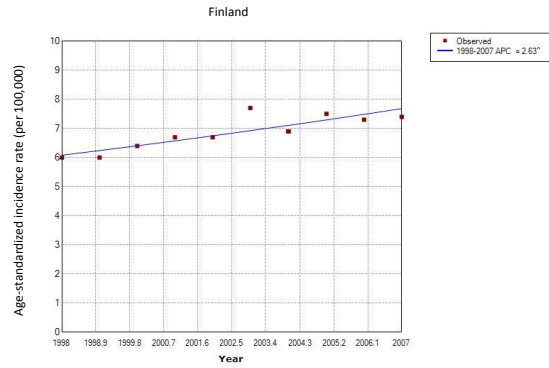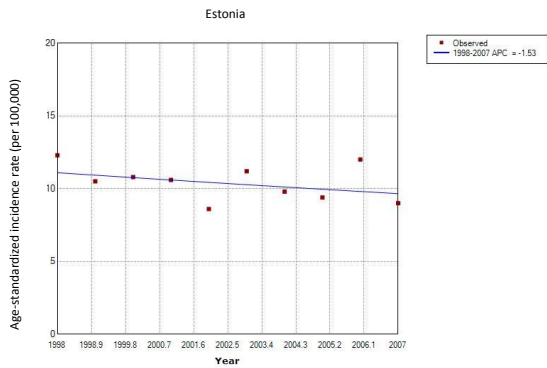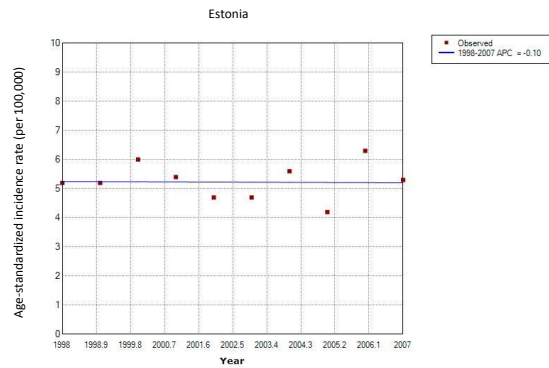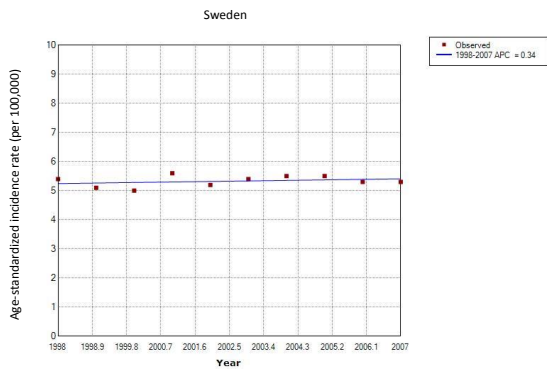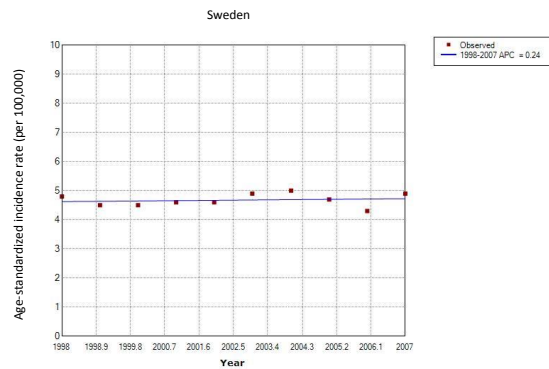

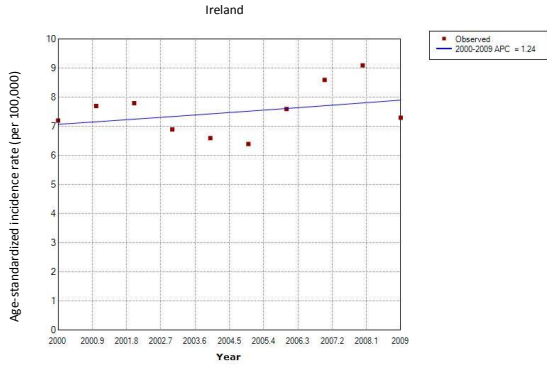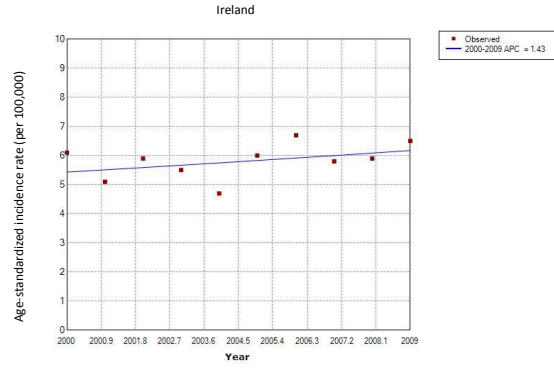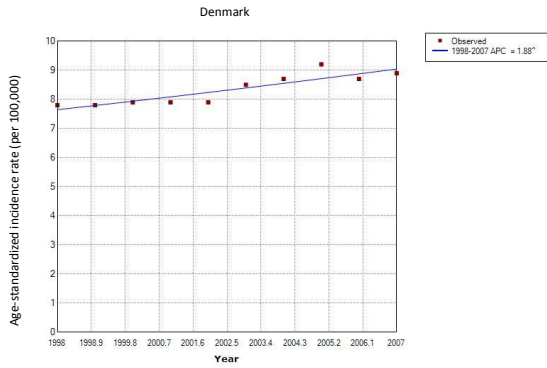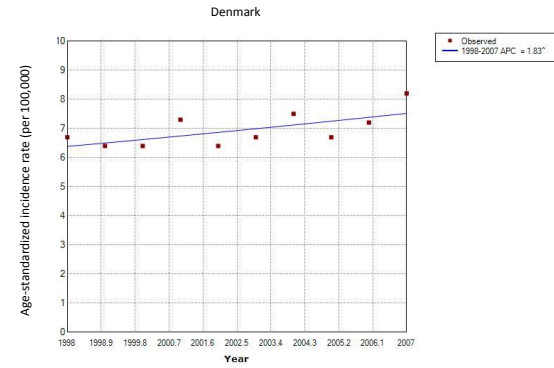

# 1) Western Europe

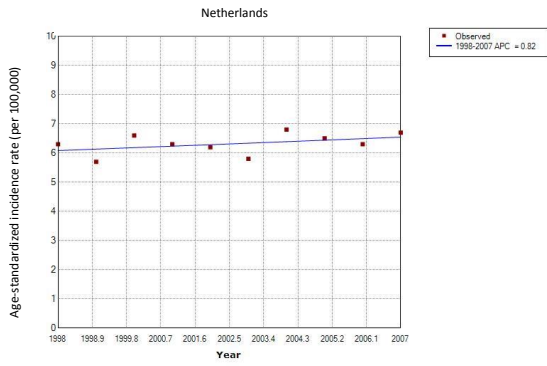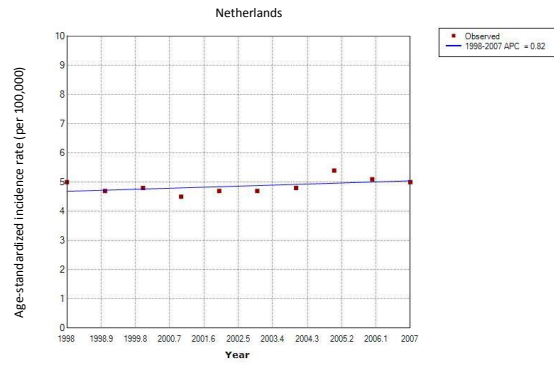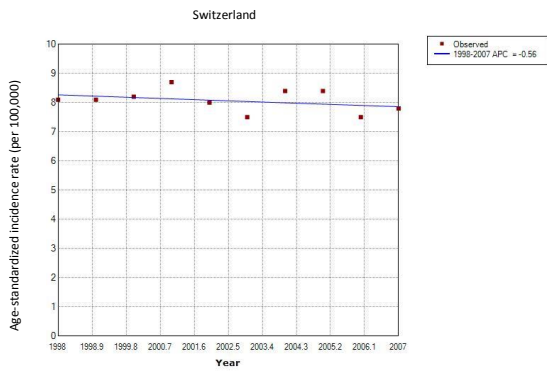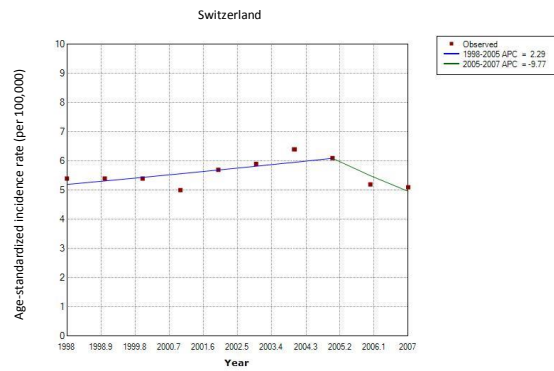



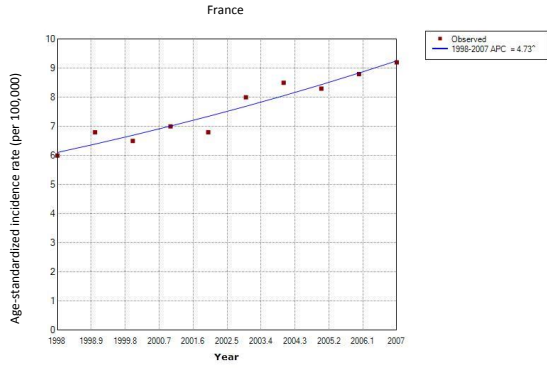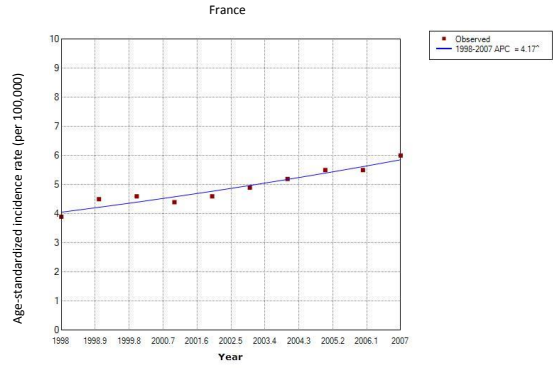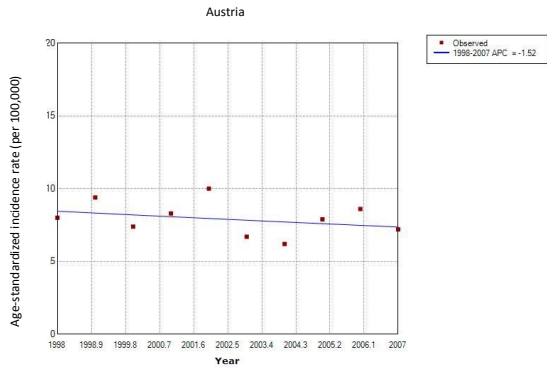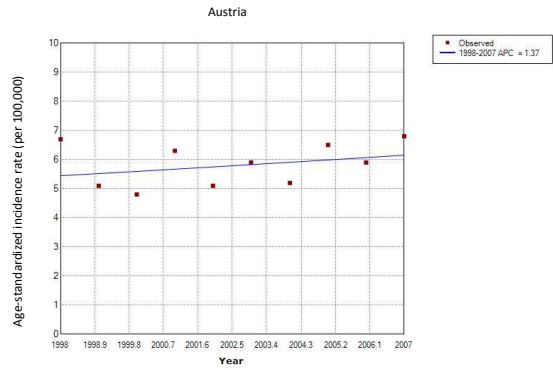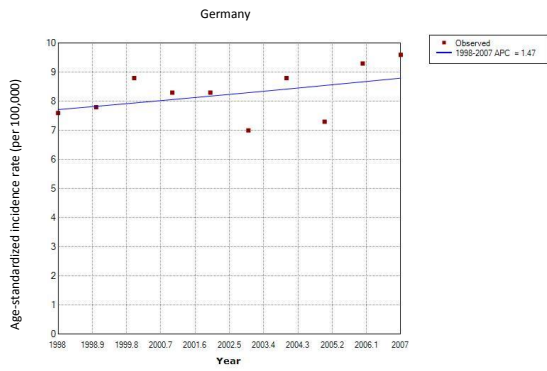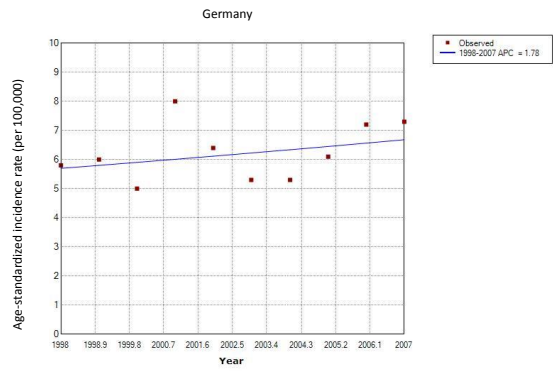

## 7) Southern Europe

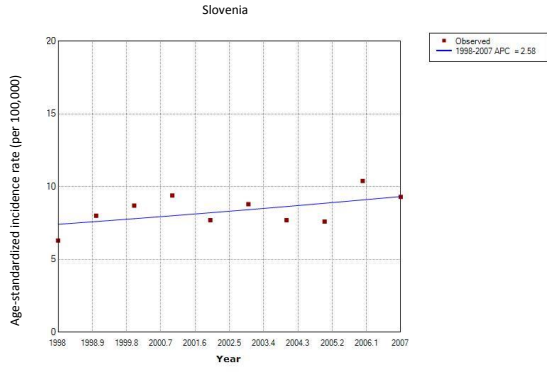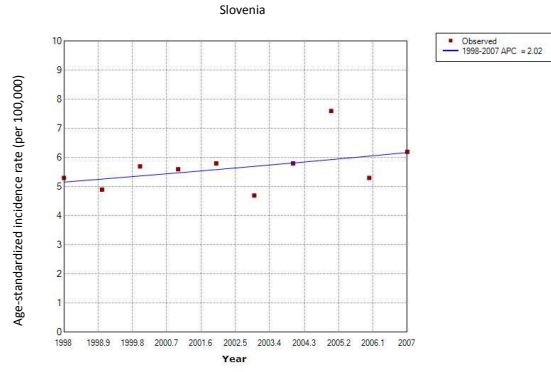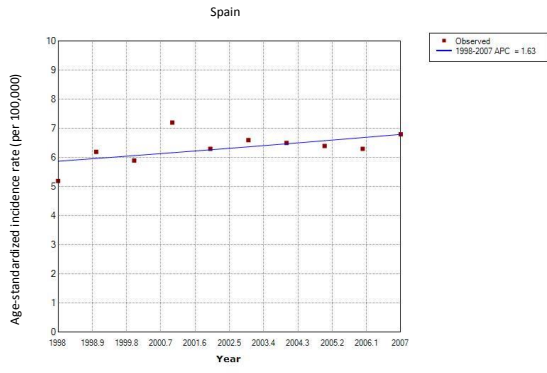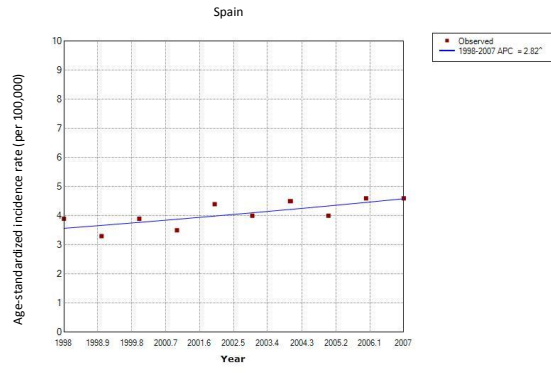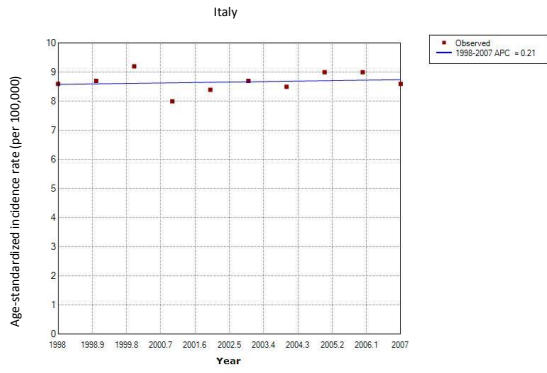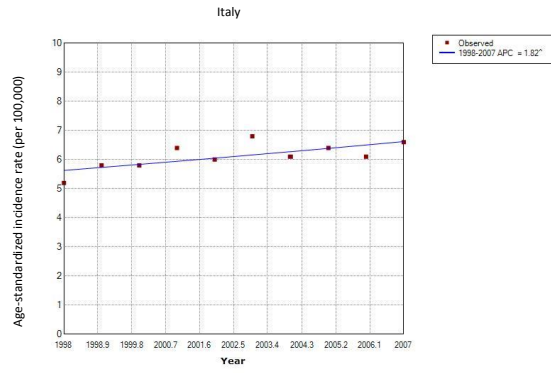

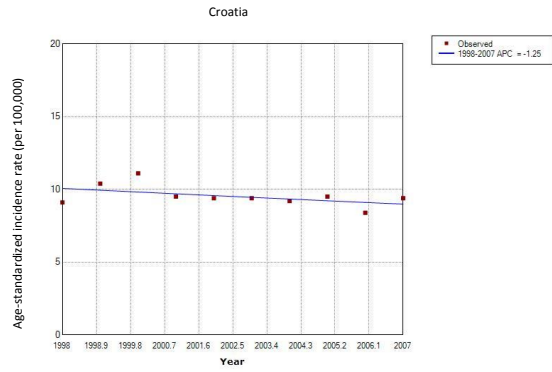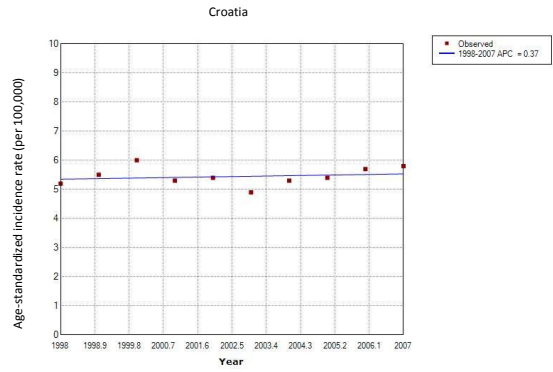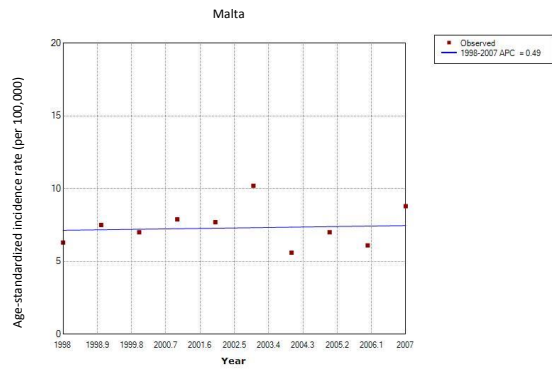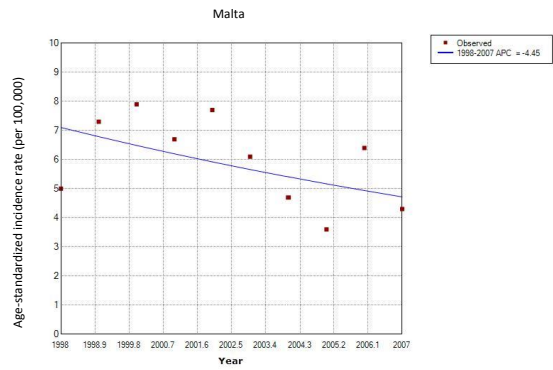

## 8) Eastern Europe

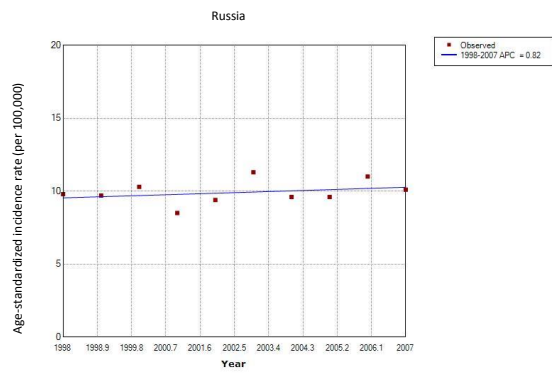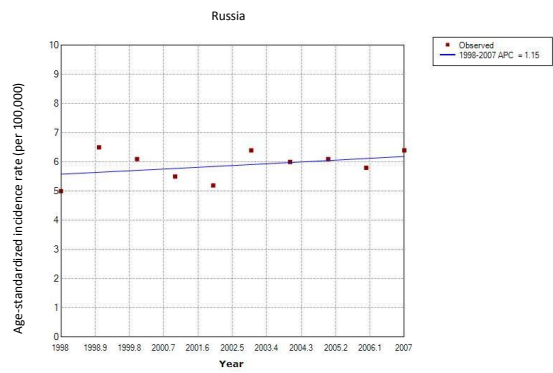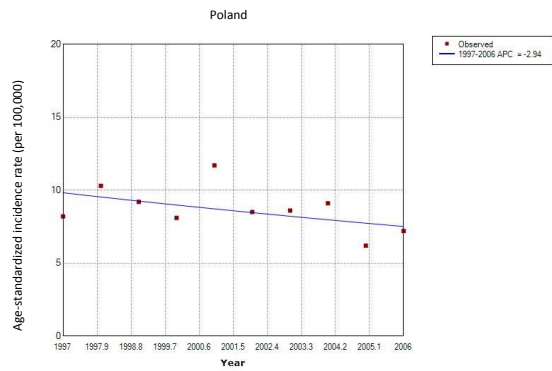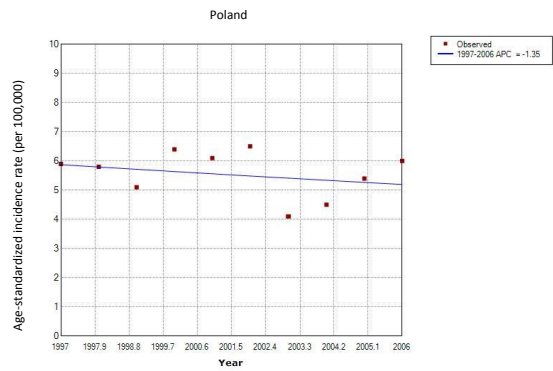

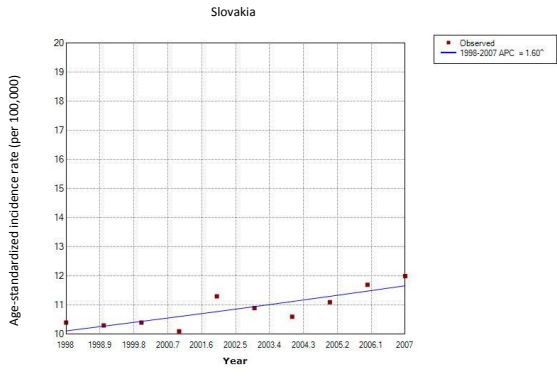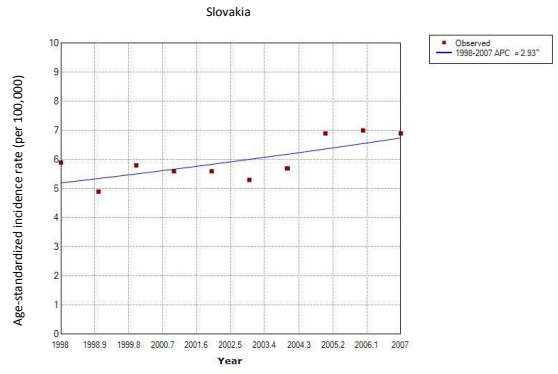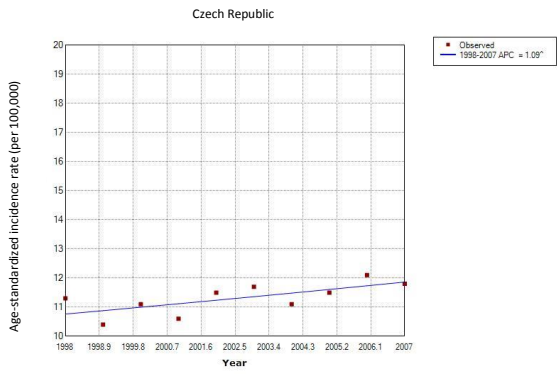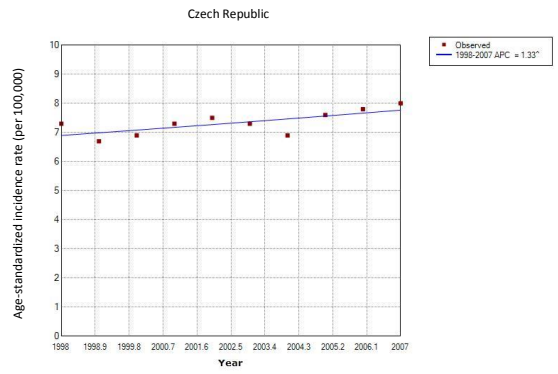

**Supplementary Figure 1b Findings from the joinpoint regression analysis of the global mortality rates of pancreatic cancer (Left: Male, Right: Female)**

**1) Latin America and the Caribbean**

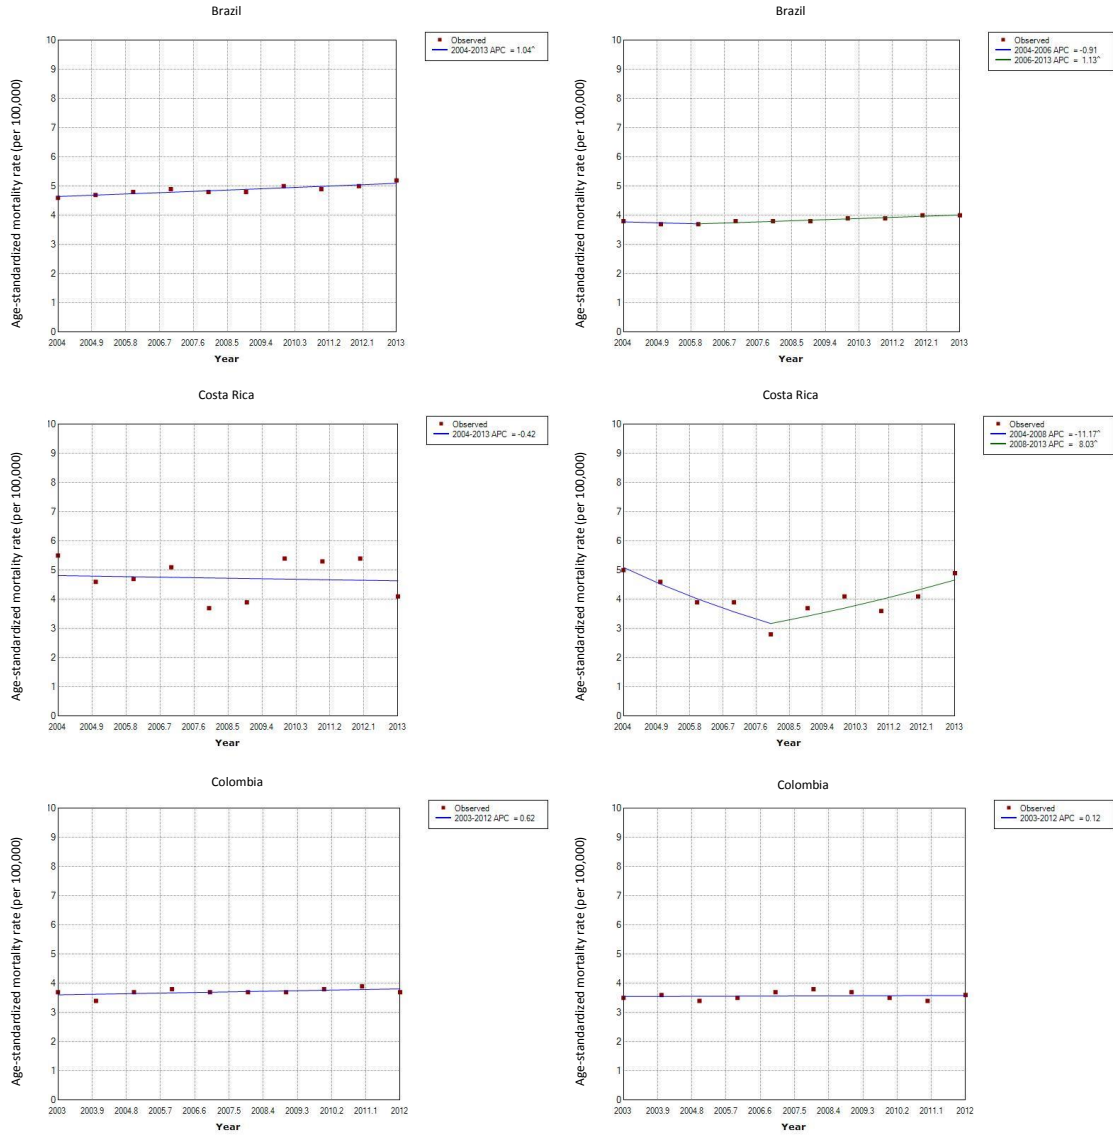

**Northern America**

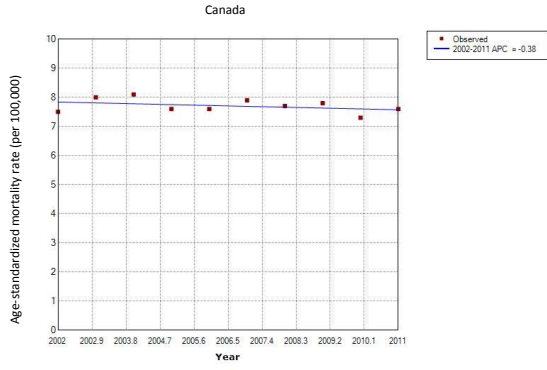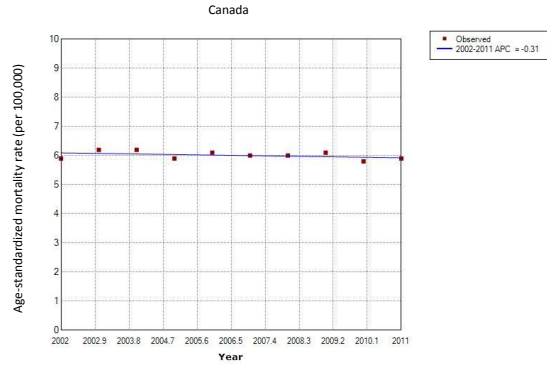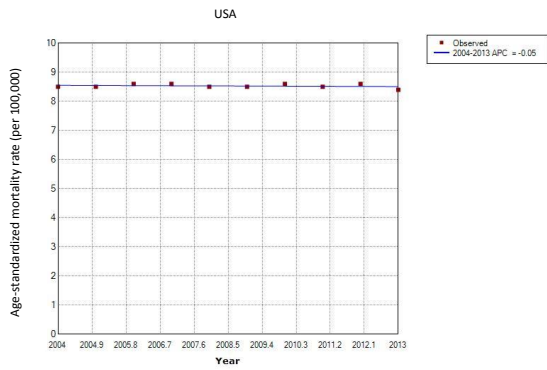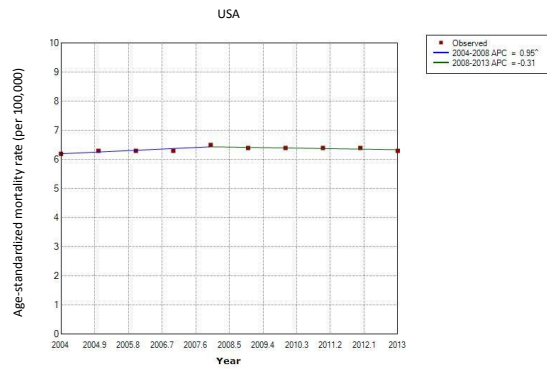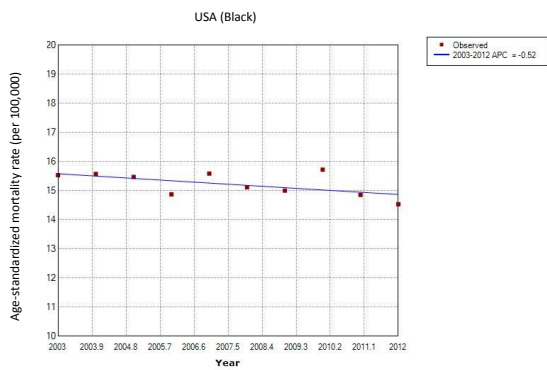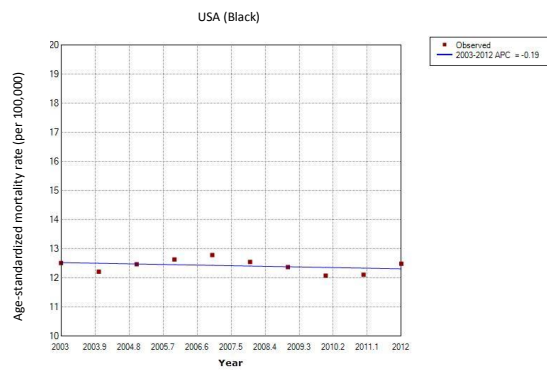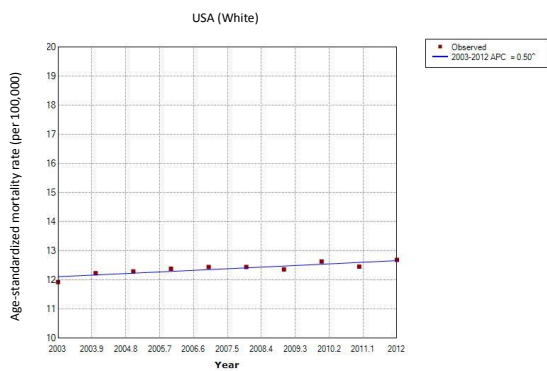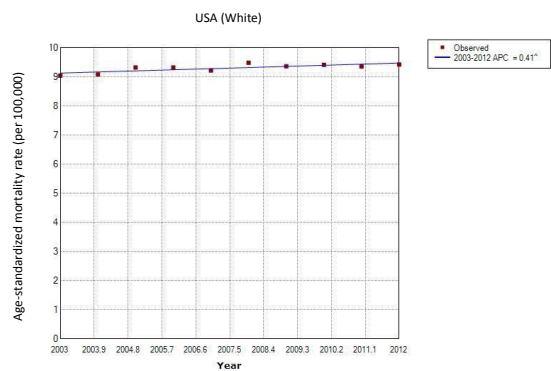

## 2) Asia

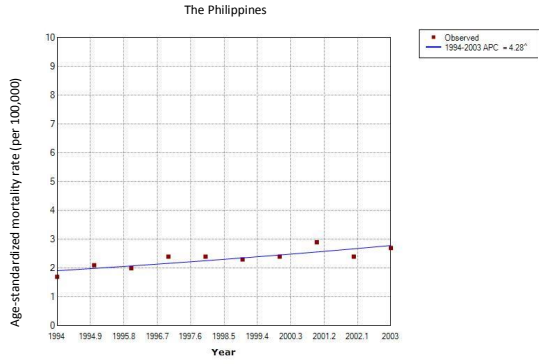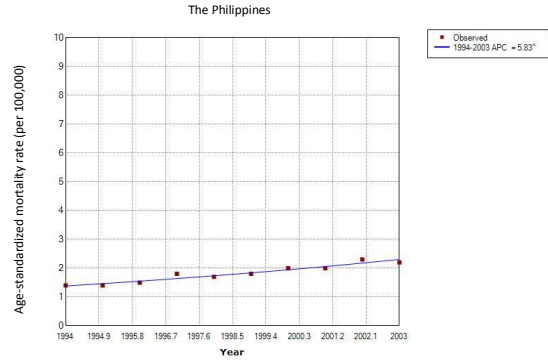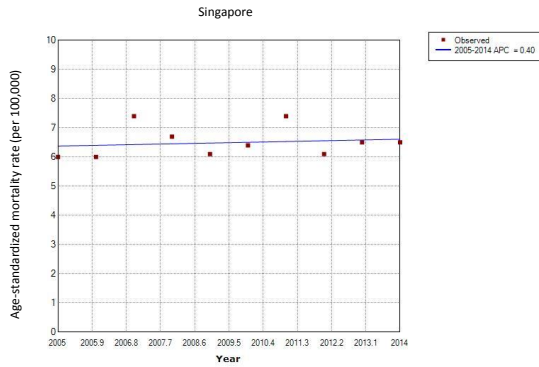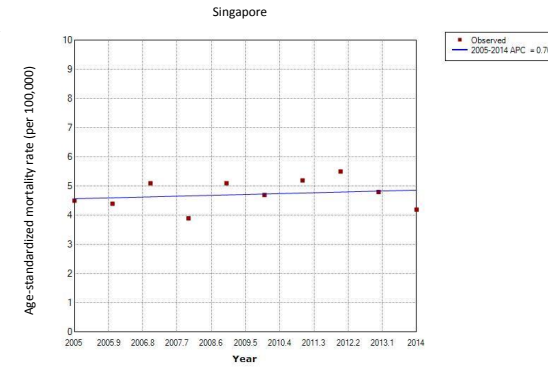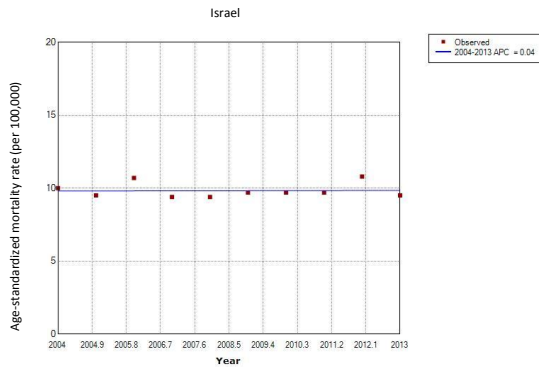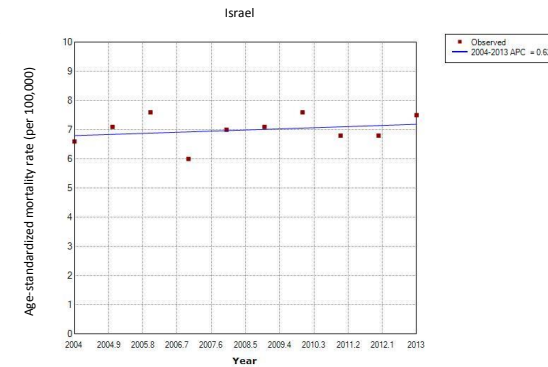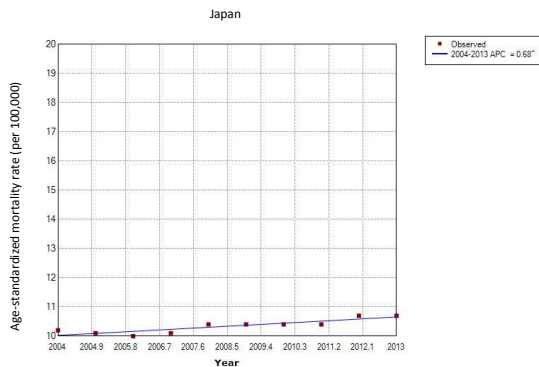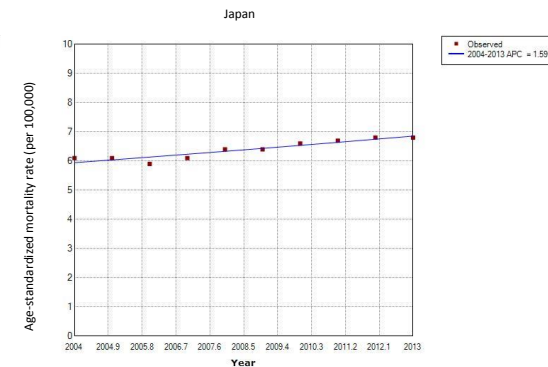

### 3) Oceania

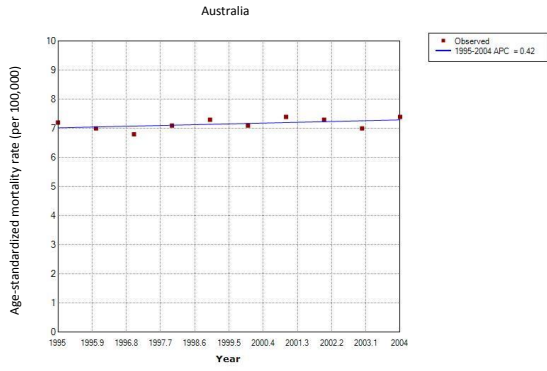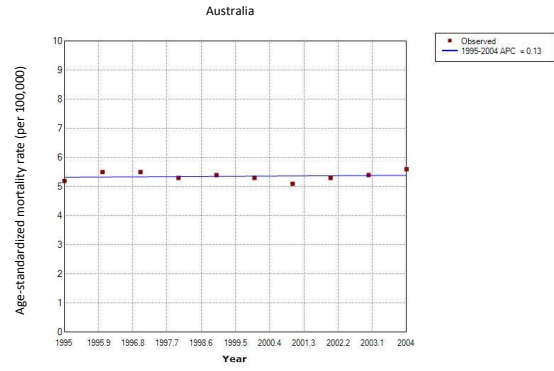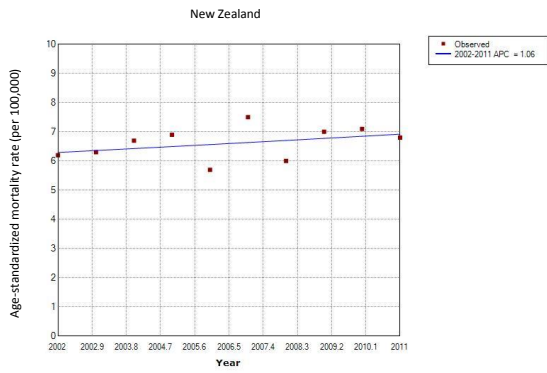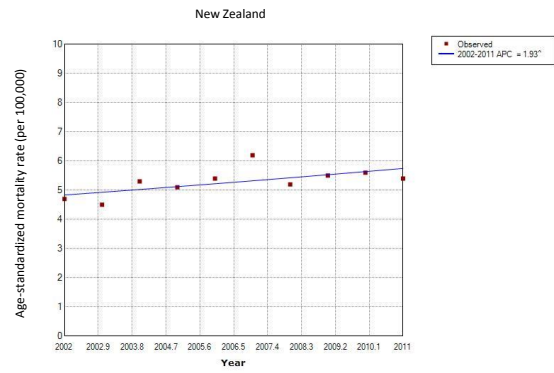

### 4) Northern Europe



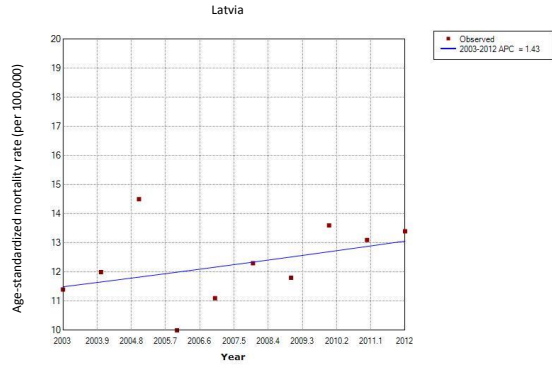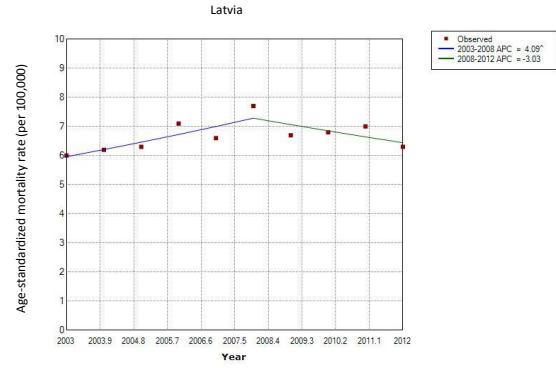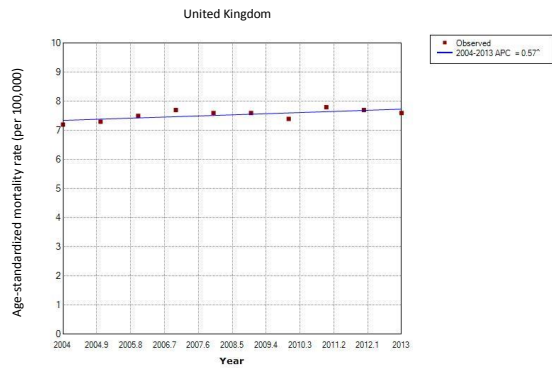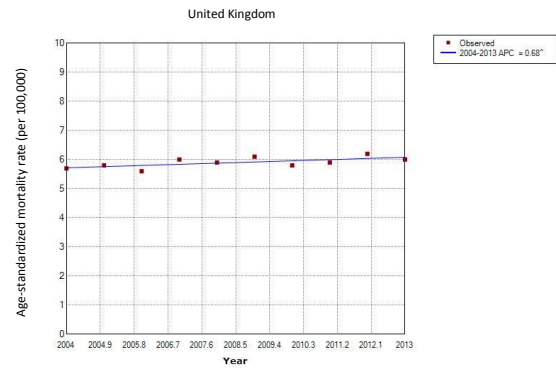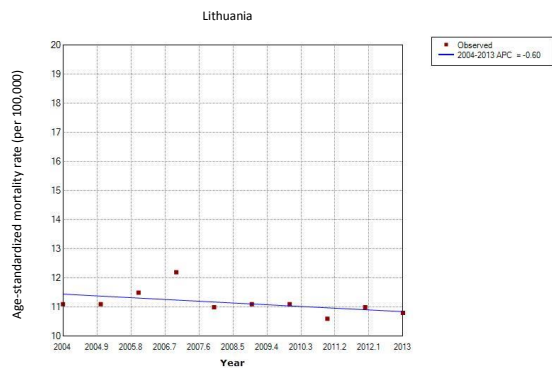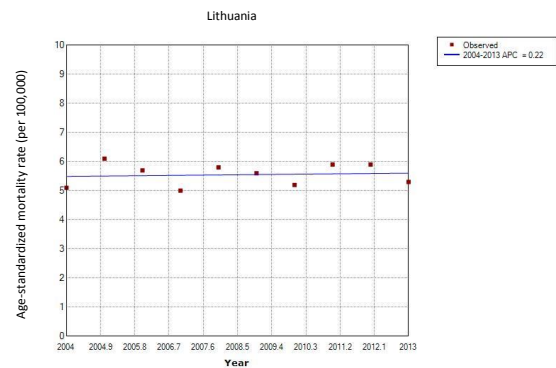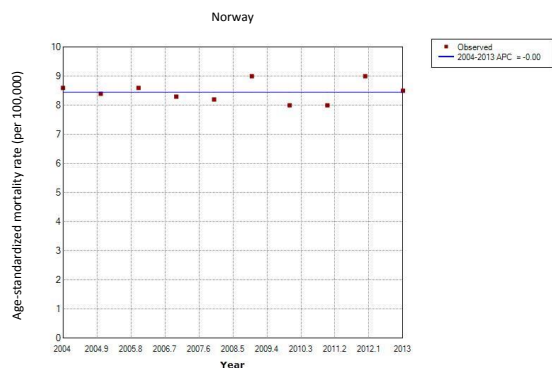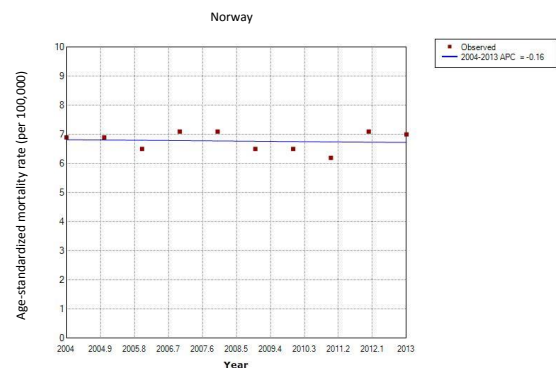

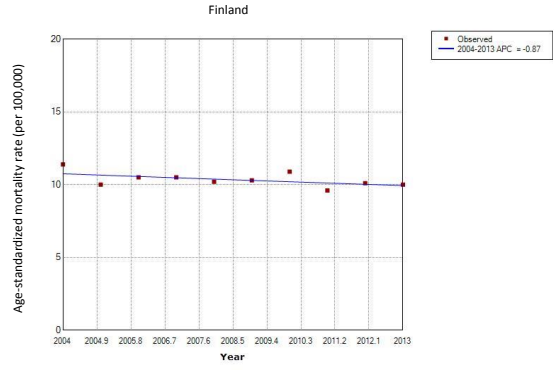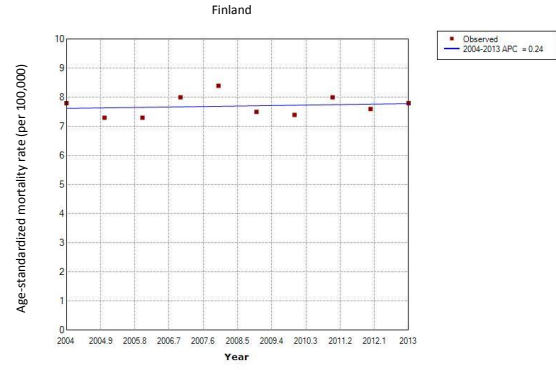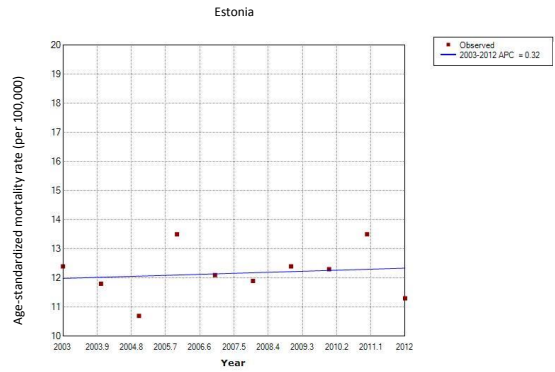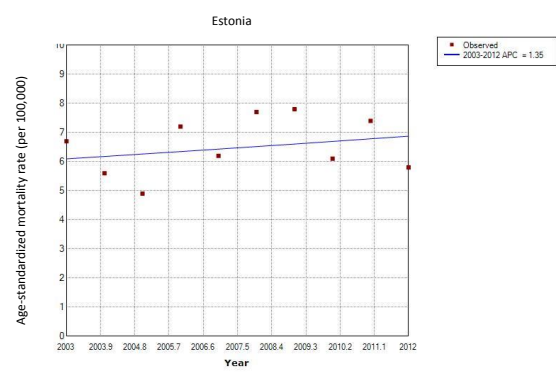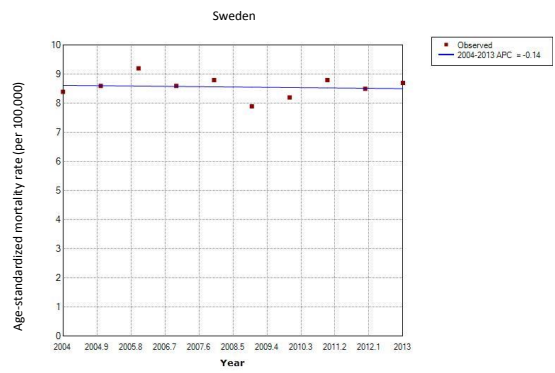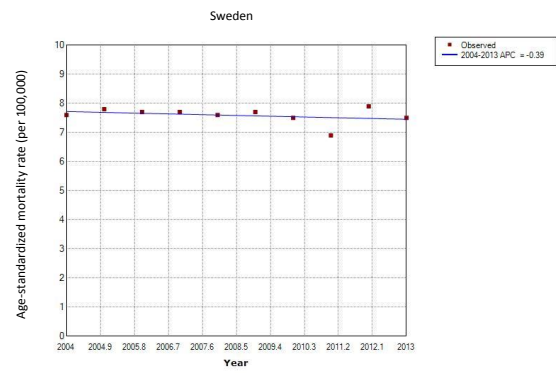

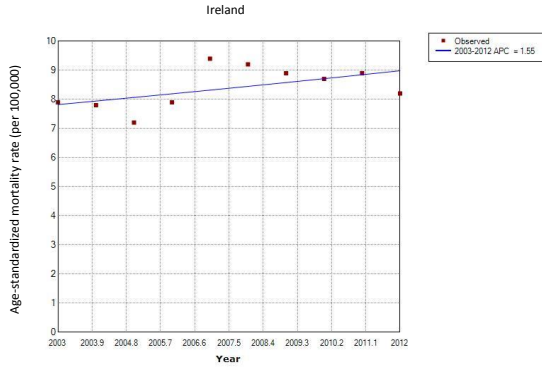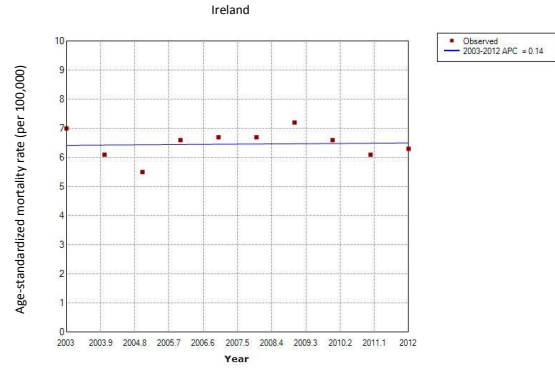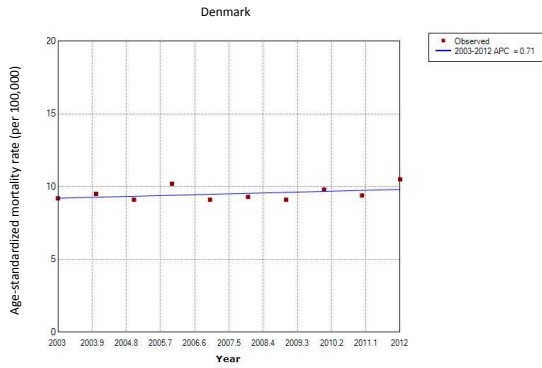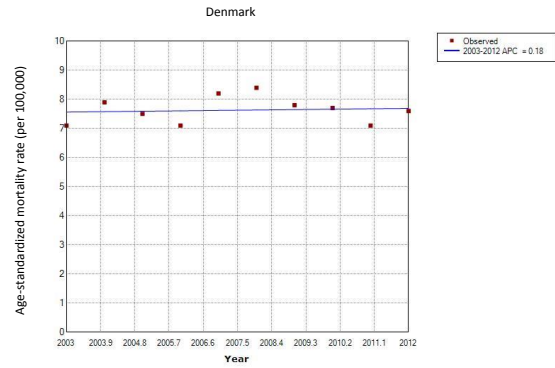

## 5) Western Europe

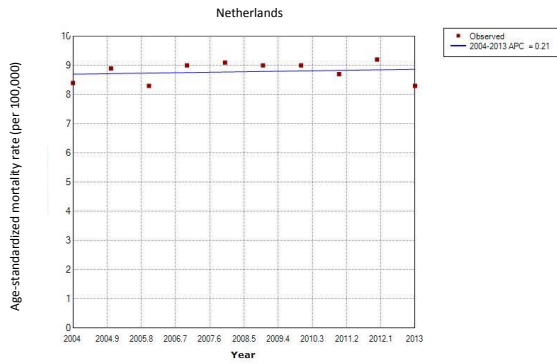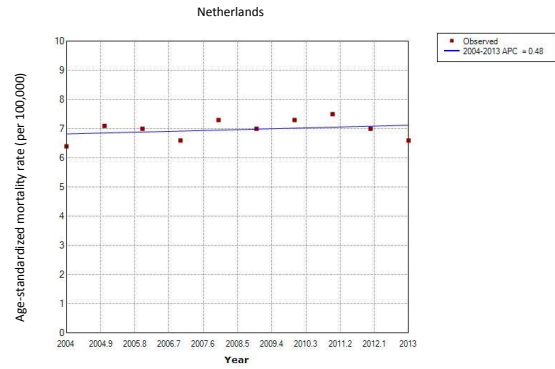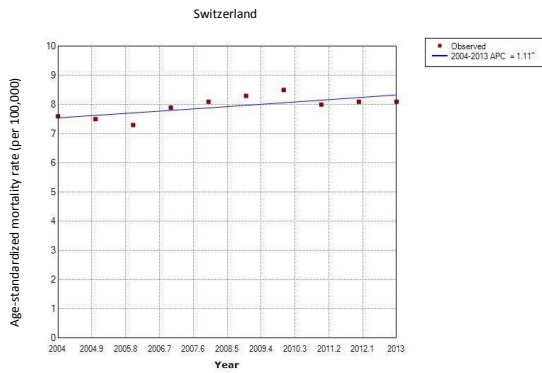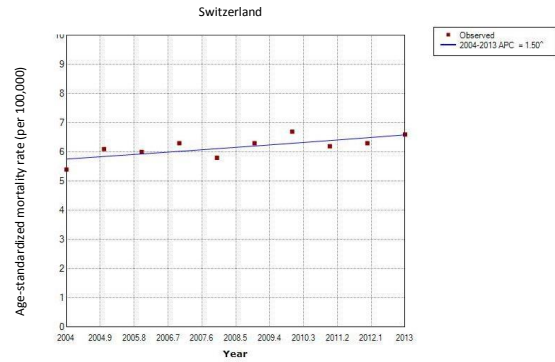

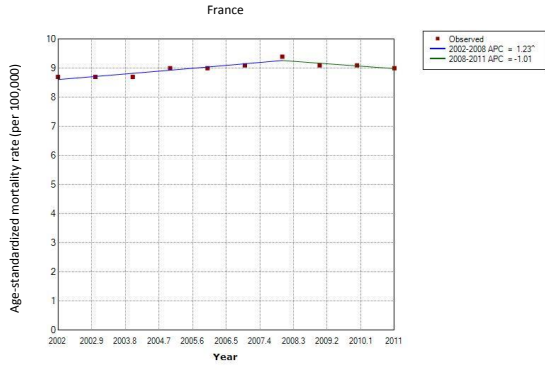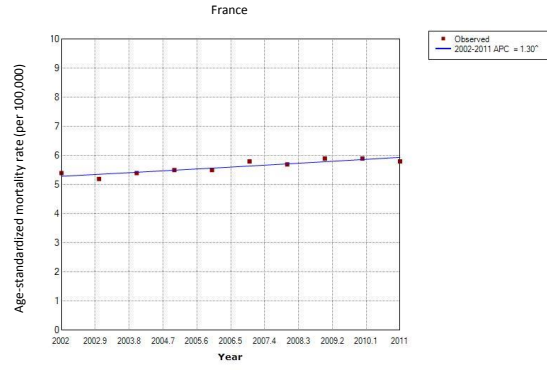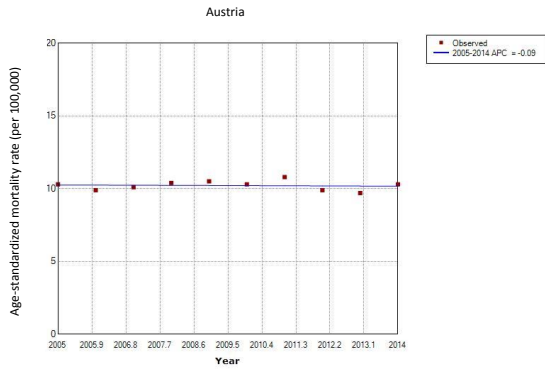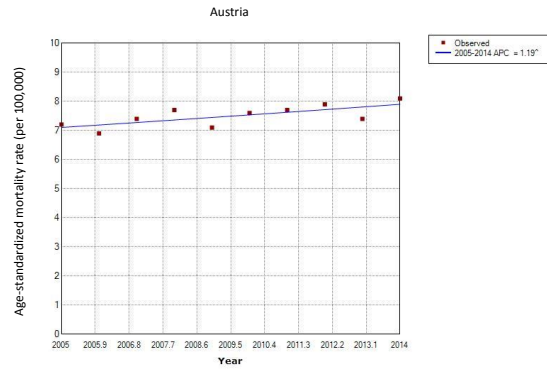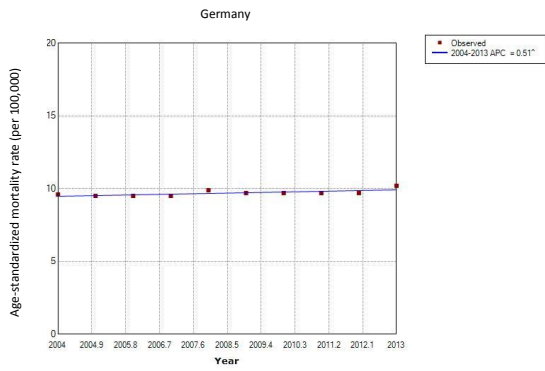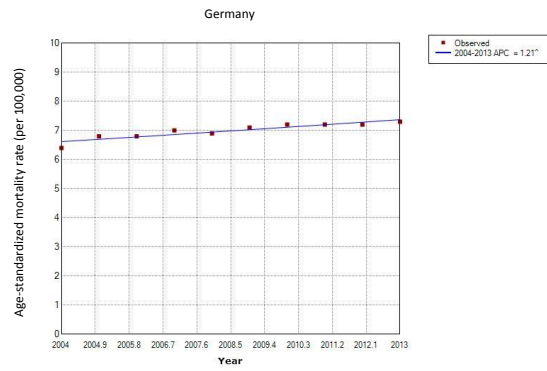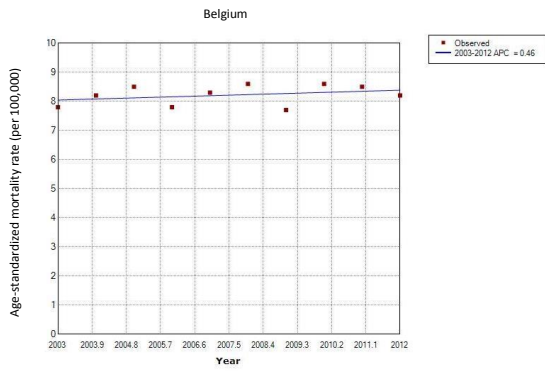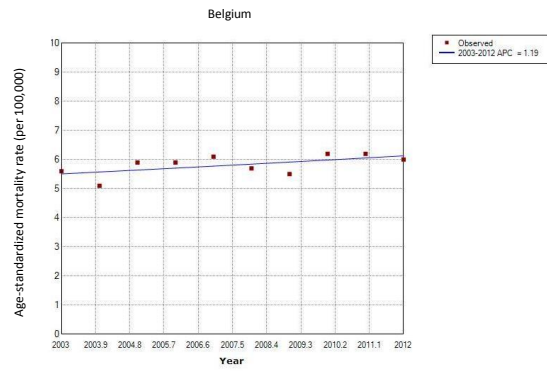

## 6) Southern Europe

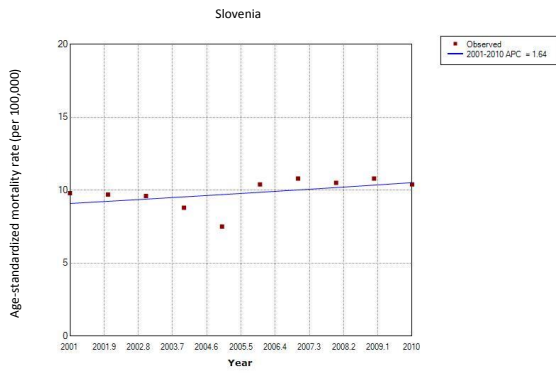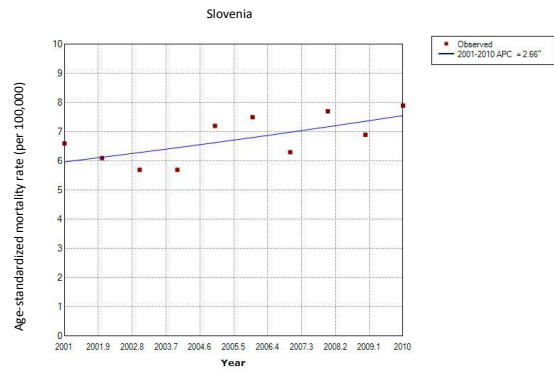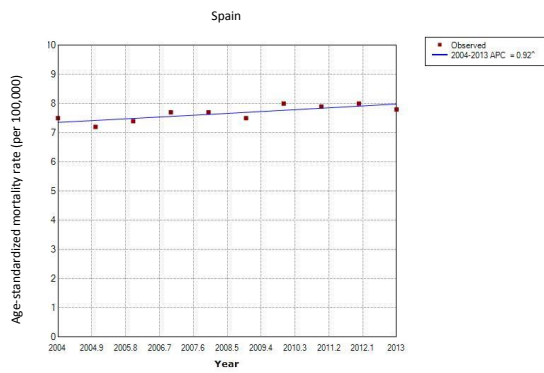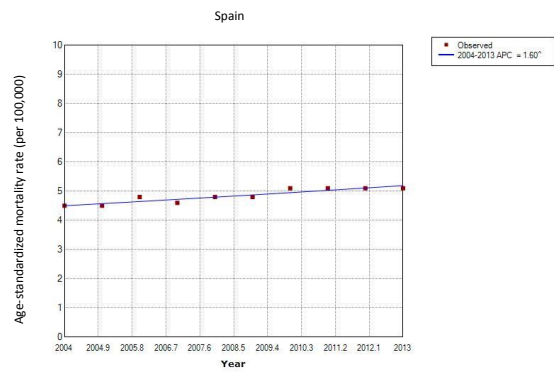

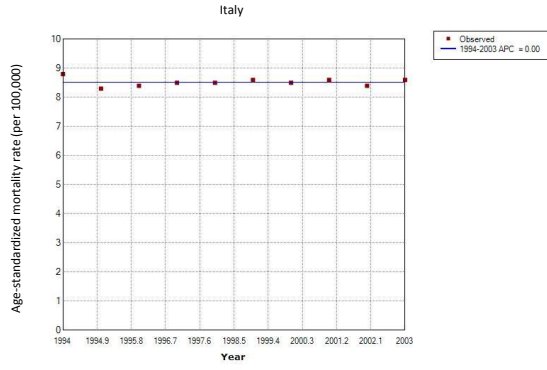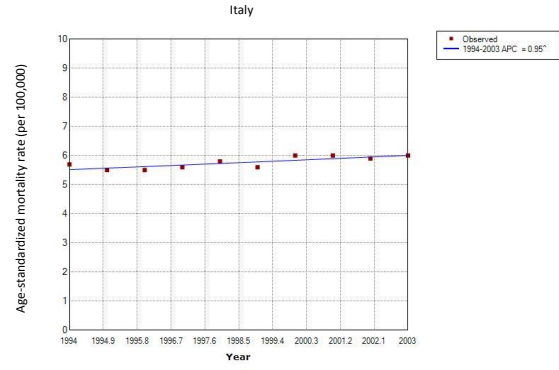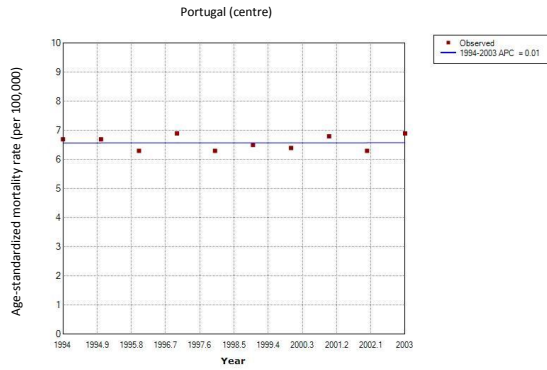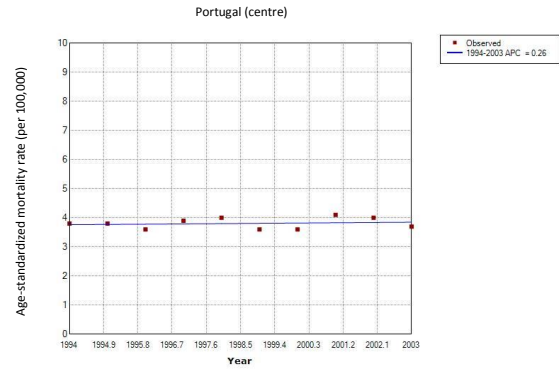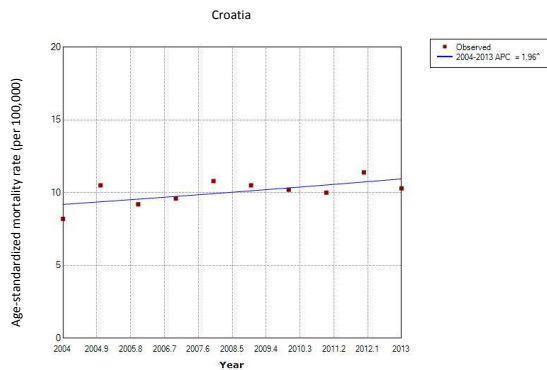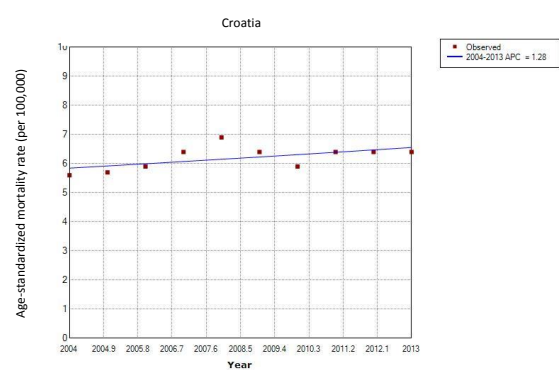

## 7) Eastern Europe

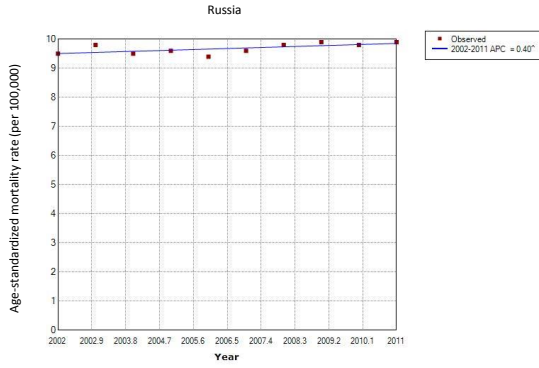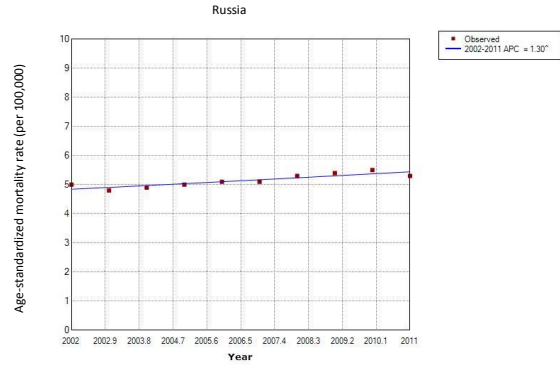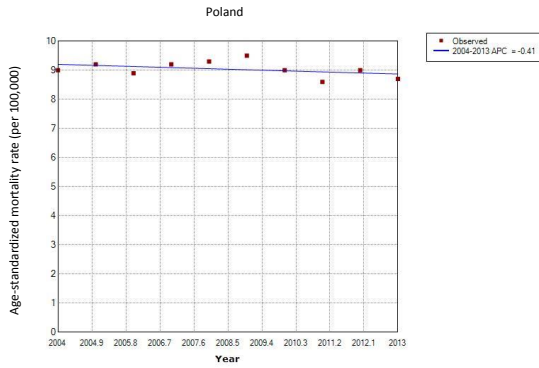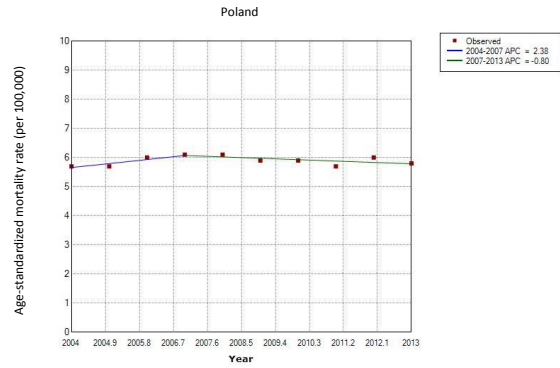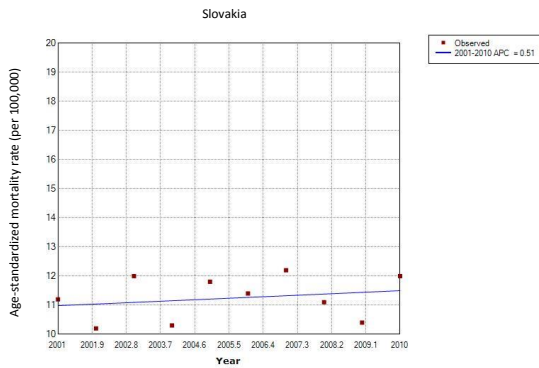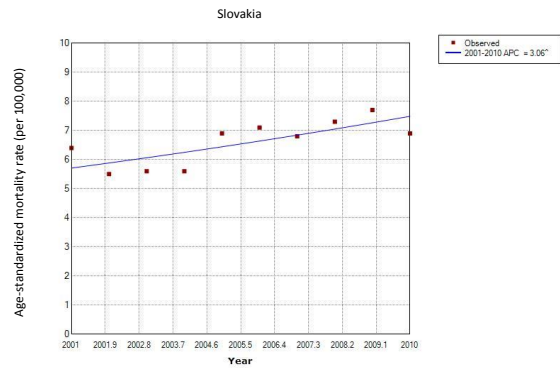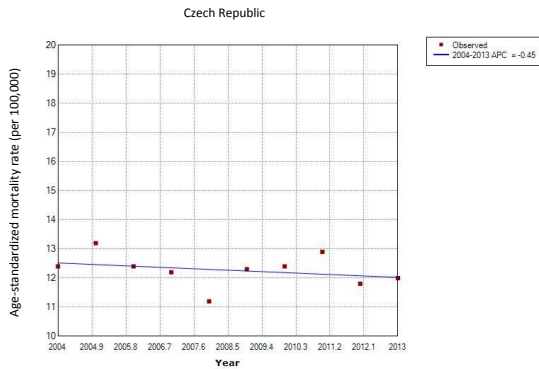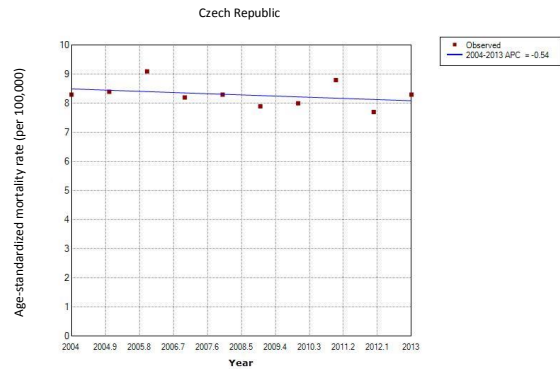

Supplement: 41598_2017_2997_MOESM1_ESM.pdf [file 41598_2017_2997_MOESM1_ESM.pdf]
